# Supplementary figures and images for: Prodrug-based self-assembled nanoparticles formed by 3′,5′-dioleoyl floxuridine for cancer chemotherapy
Source: Royal Society of Chemistry journal article supplement (doi:10.1039/d1nj00966d), 2021-01-01

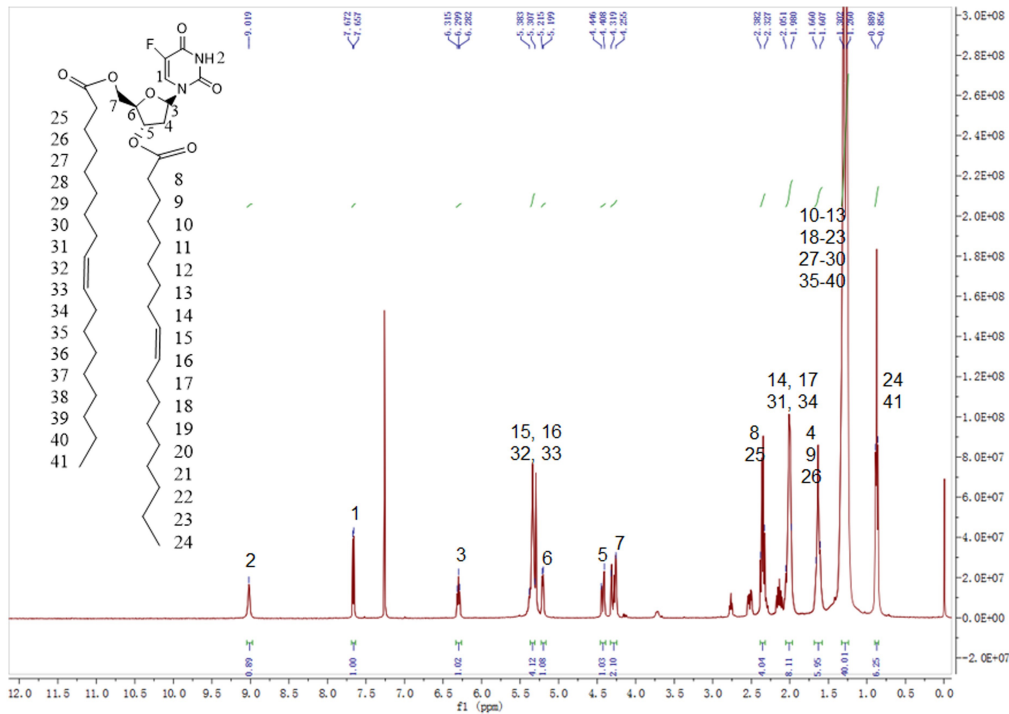

Supplement: d1nj00966d1.pdf [file d1nj00966d1.pdf]

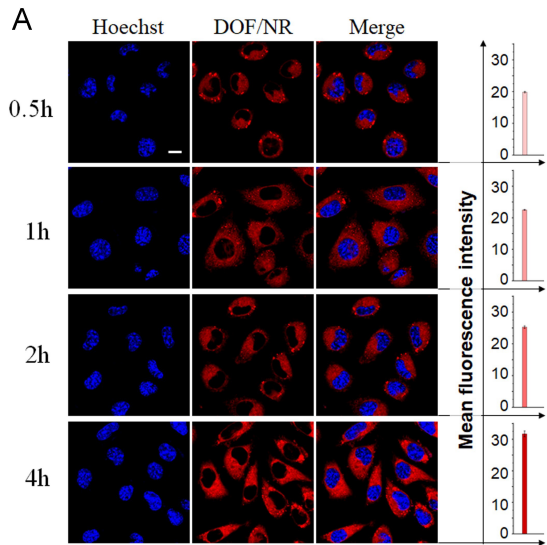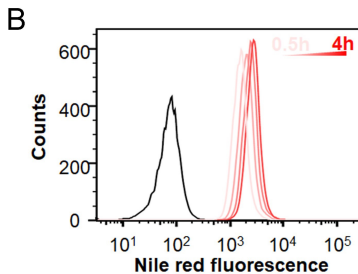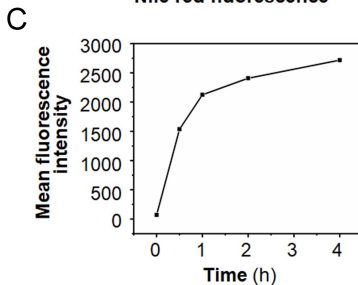

Supplement: d1nj00966d10.pdf [file d1nj00966d10.pdf]

**A**

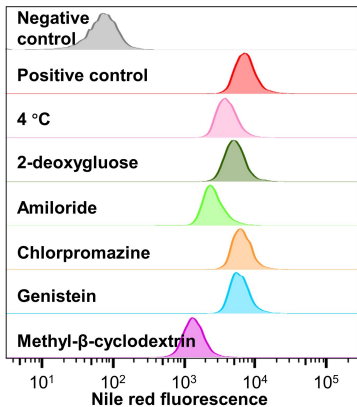

**B**

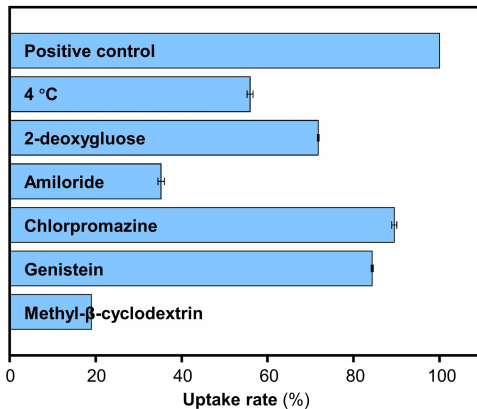

Supplement: d1nj00966d2.pdf [file d1nj00966d2.pdf]

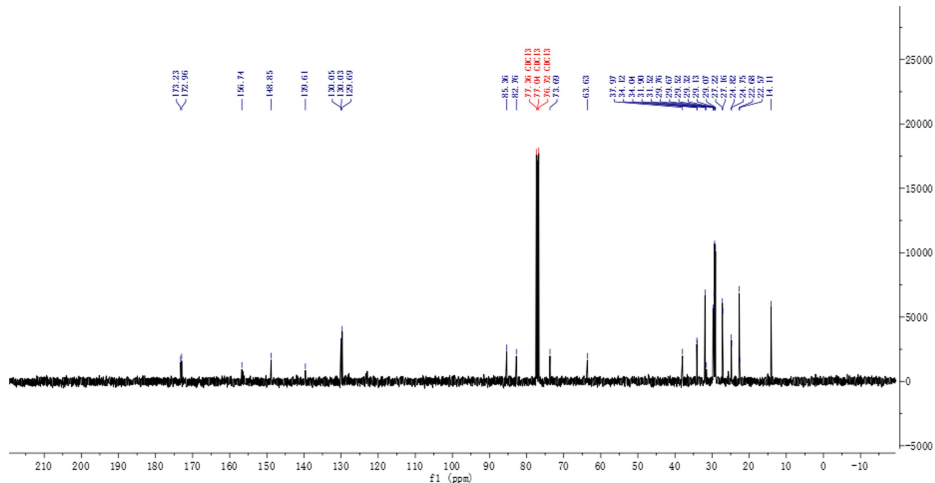

Supplement: d1nj00966d3.pdf [file d1nj00966d3.pdf]

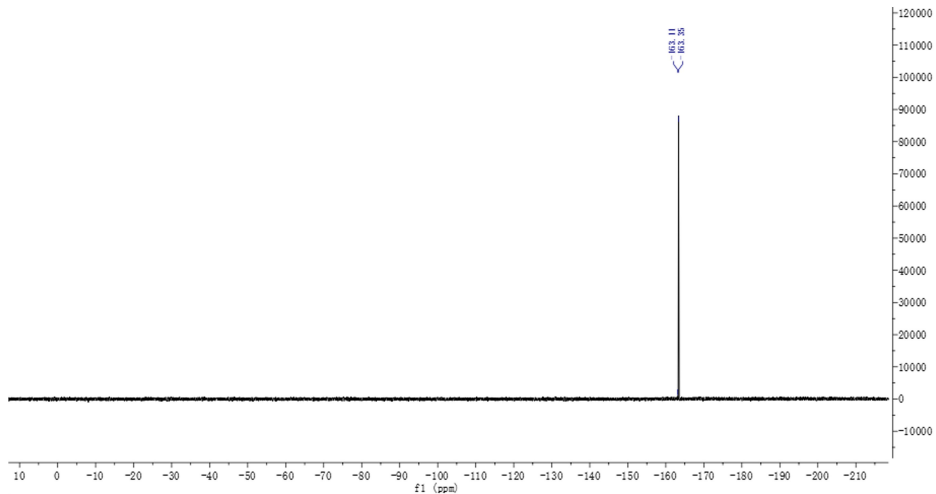

Supplement: d1nj00966d4.pdf [file d1nj00966d4.pdf]

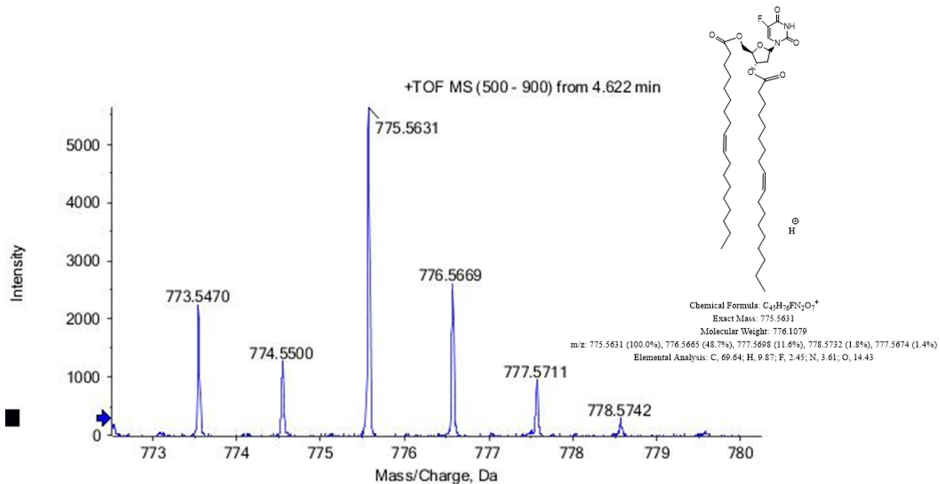

Supplement: d1nj00966d5.pdf [file d1nj00966d5.pdf]

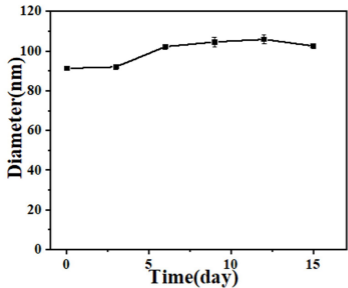

Supplement: d1nj00966d6.pdf [file d1nj00966d6.pdf]

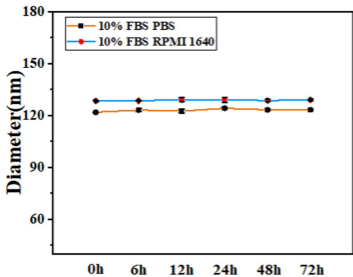

Supplement: d1nj00966d7.pdf [file d1nj00966d7.pdf]

**A**

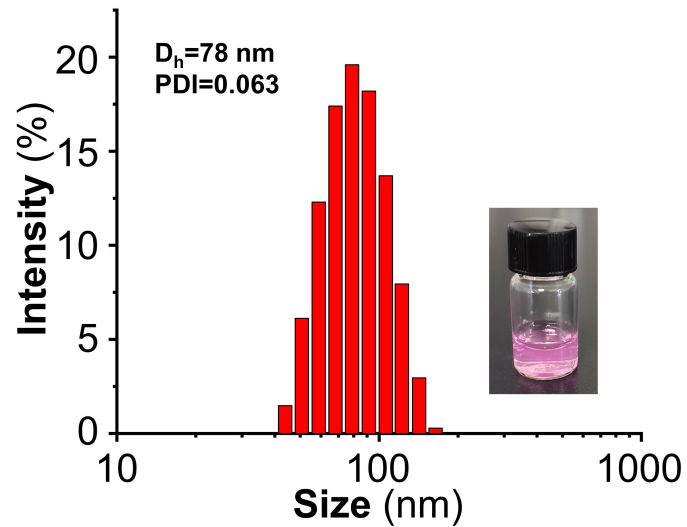

**B**

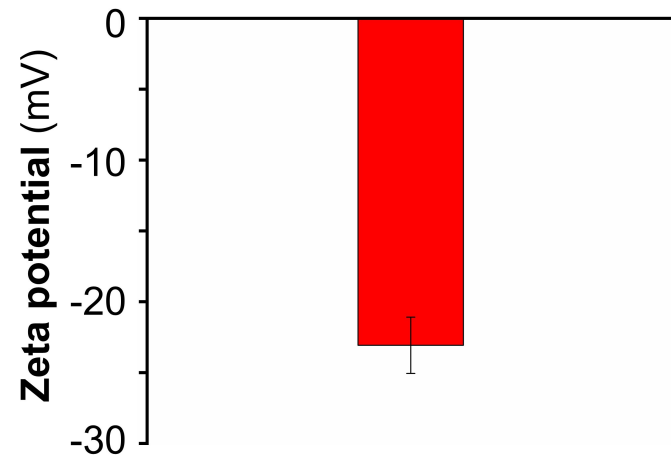

**C**

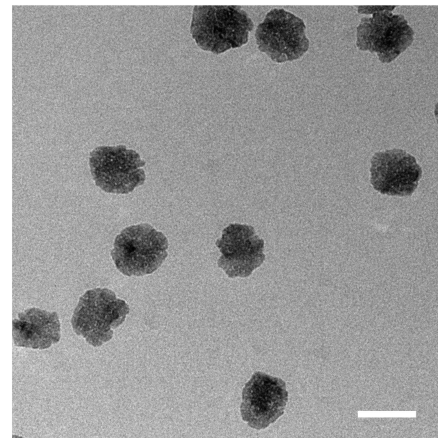

Supplement: d1nj00966d8.pdf [file d1nj00966d8.pdf]

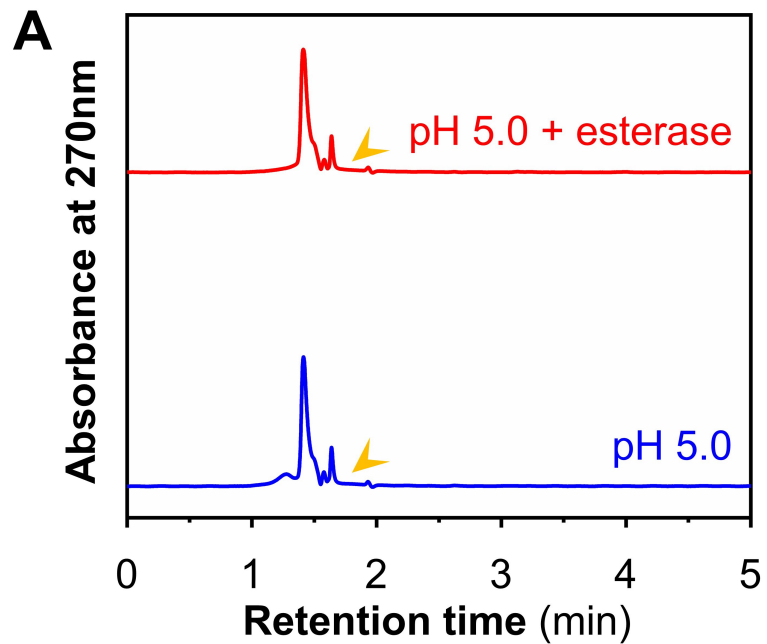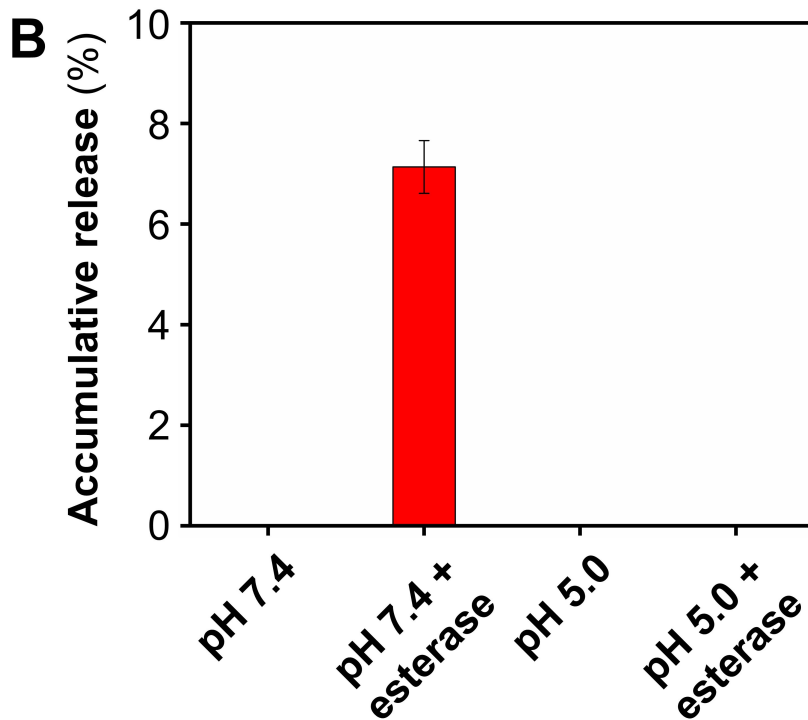

Supplement: d1nj00966d9.pdf [file d1nj00966d9.pdf]
